# Supplementary material for: Evaluation of Resistance of Oilseed Rape Genotypes to Turnip Yellows Virus
Source: MDPI journal article supplement (doi:10.3390/plants12132501), 2023-06-30
Supplement: s1 [file s1]

Supplementary Figures S1-S5

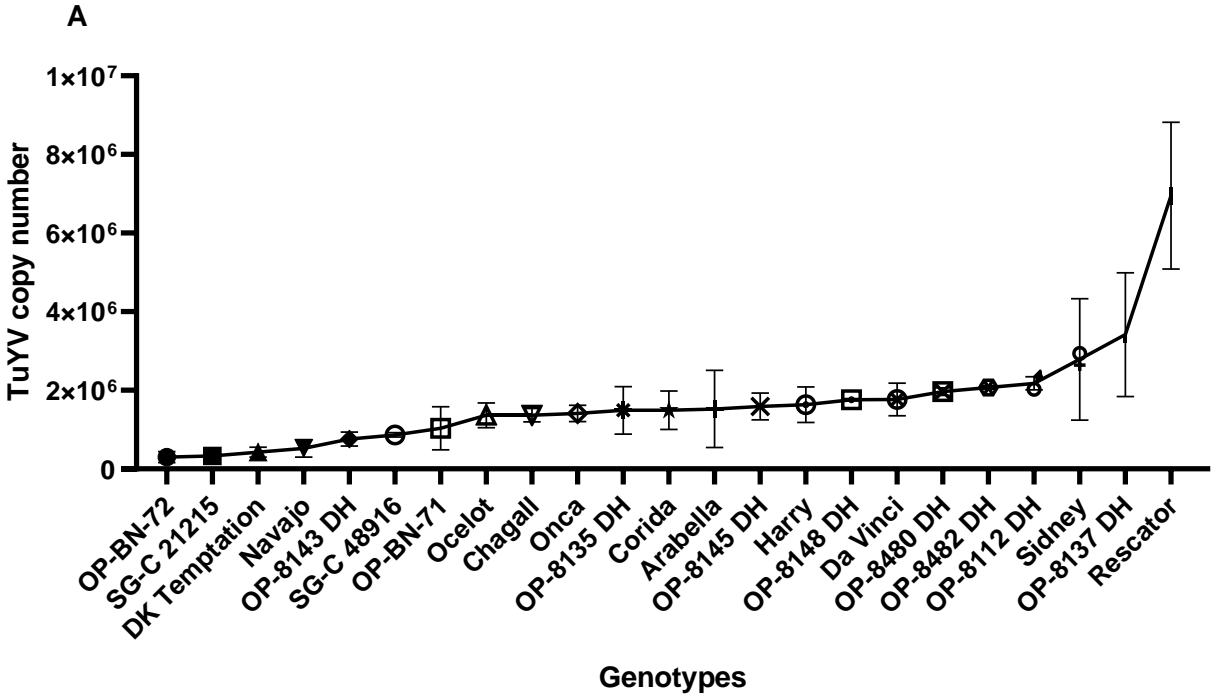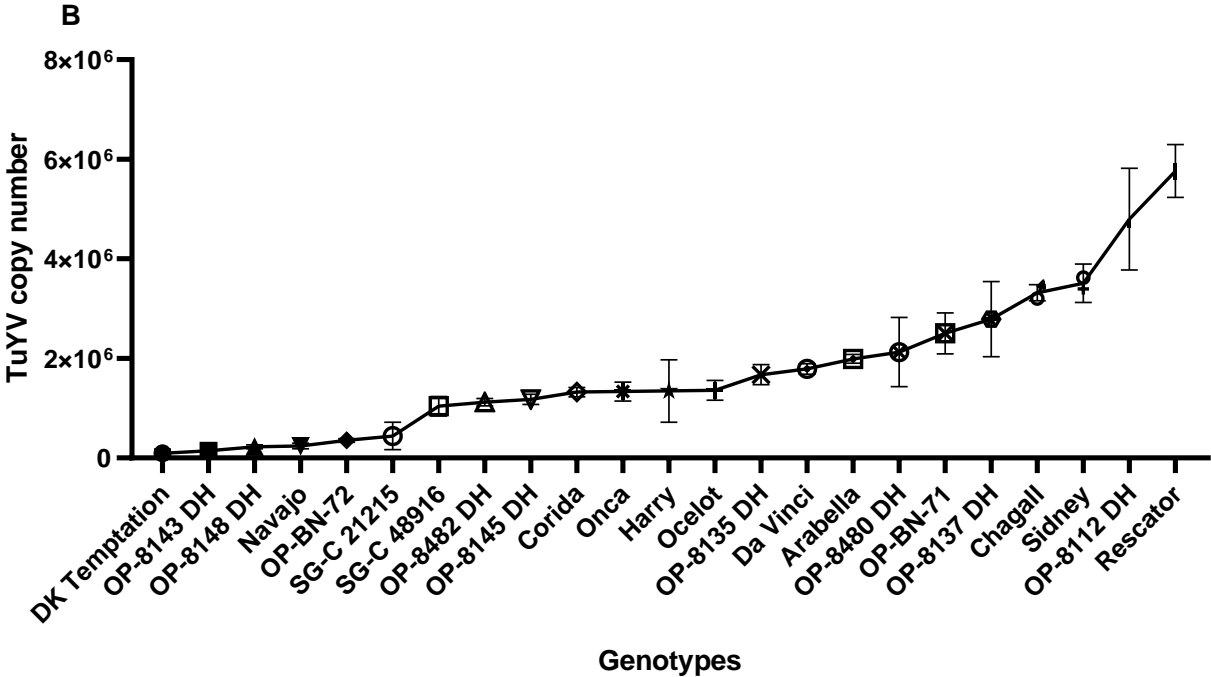

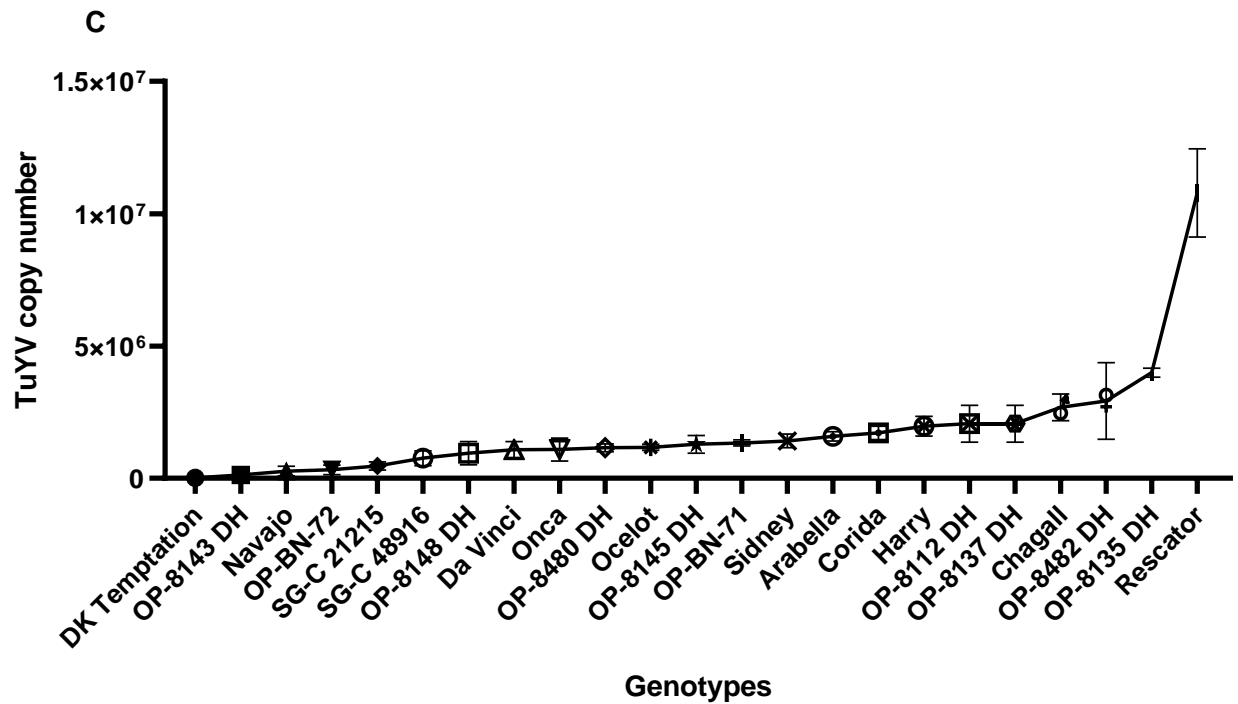

**Supplementary Figure S1.** The mean TuYV titres (copy number) for each oilseed rape genotypes in the First greenhouse trial (A), the second greenhouse trial (B) and the third greenhouse trial (C). Bars on each column represent standard errors.

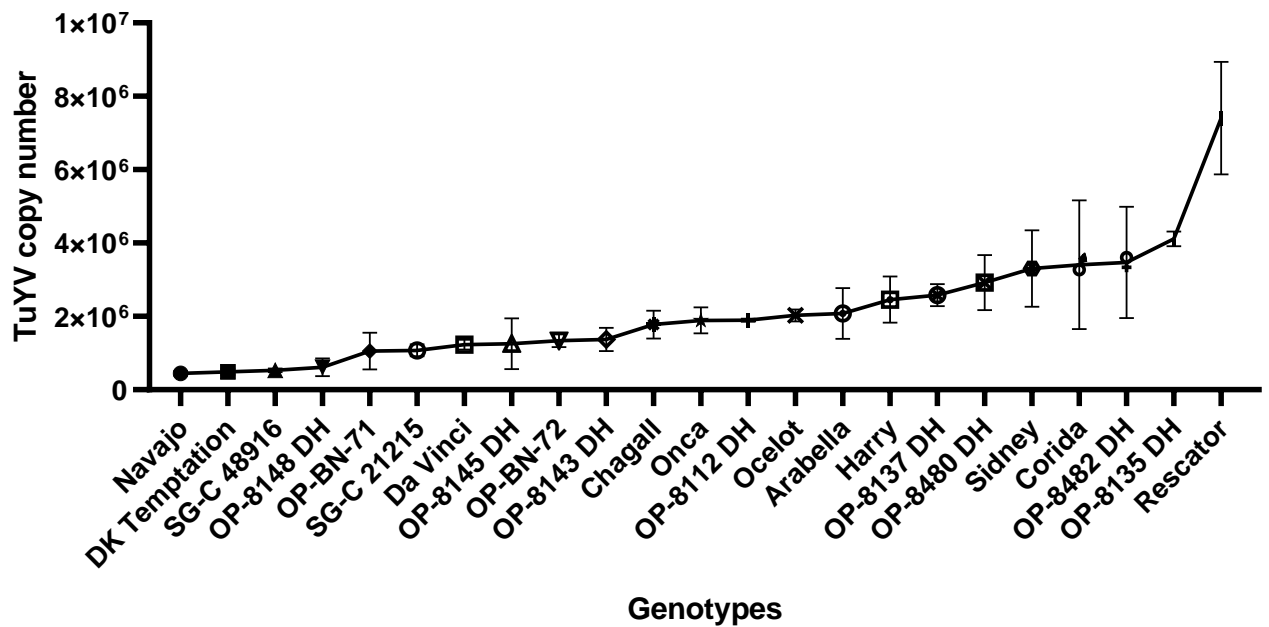

**Supplementary Figure S2.** The mean TuYV titres (copy number) for each oilseed rape genotypes from the first year field trial (2020/2021)-second sampling in early spring 2021. Bars on each column represent standard errors.

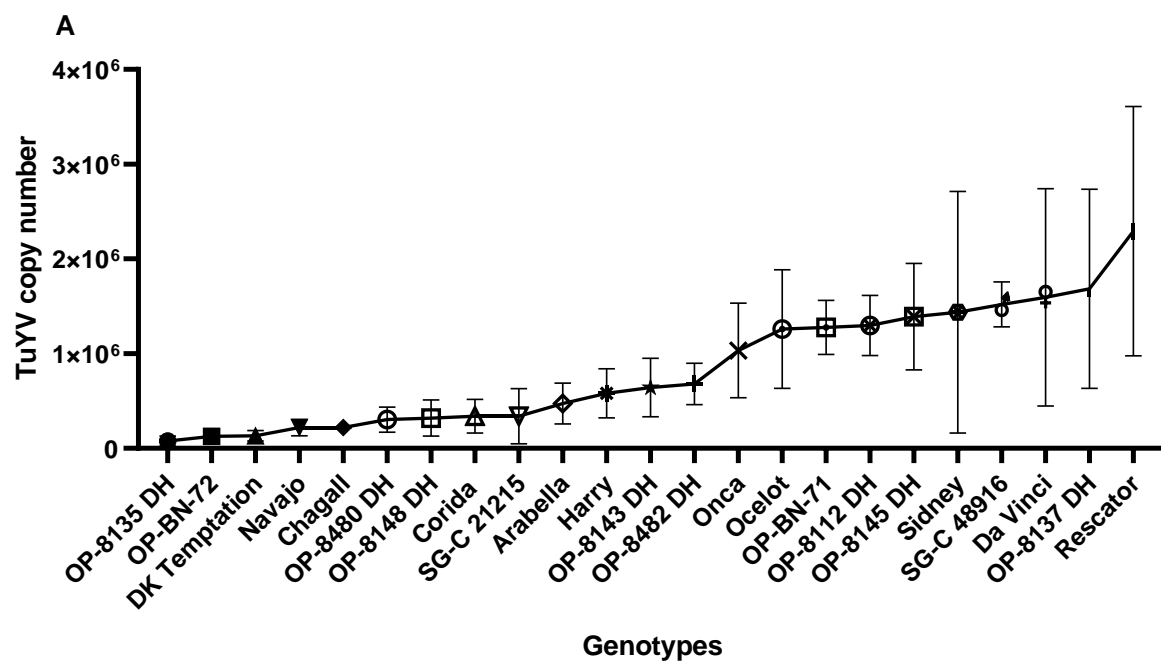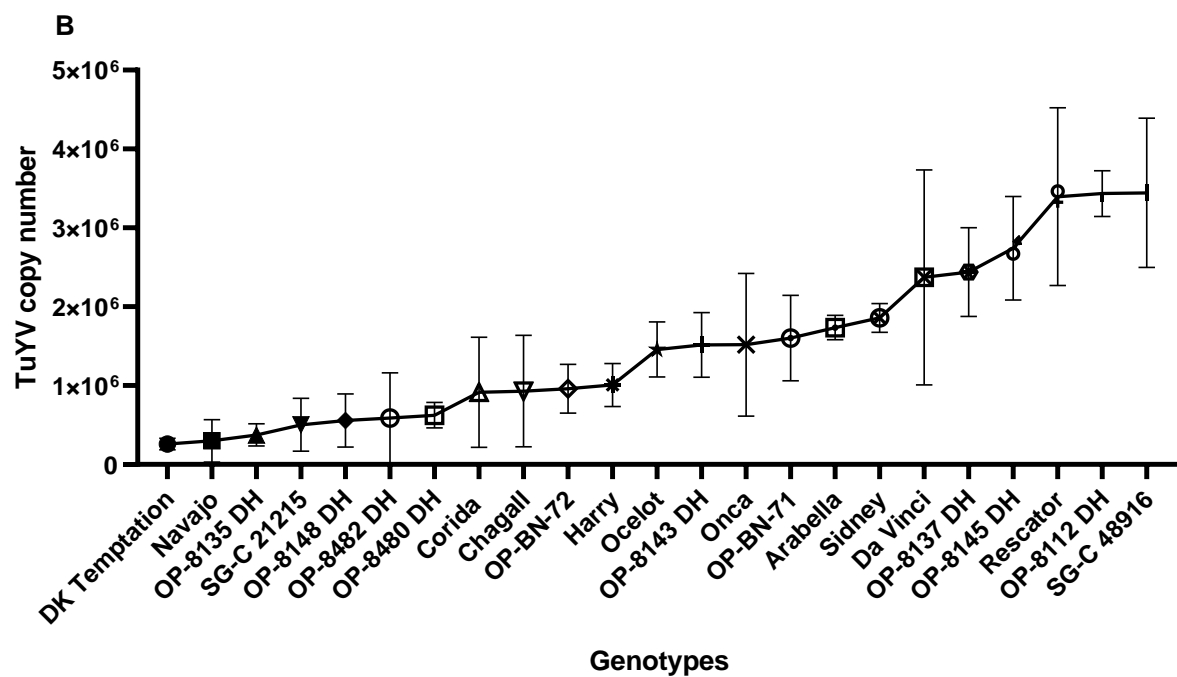

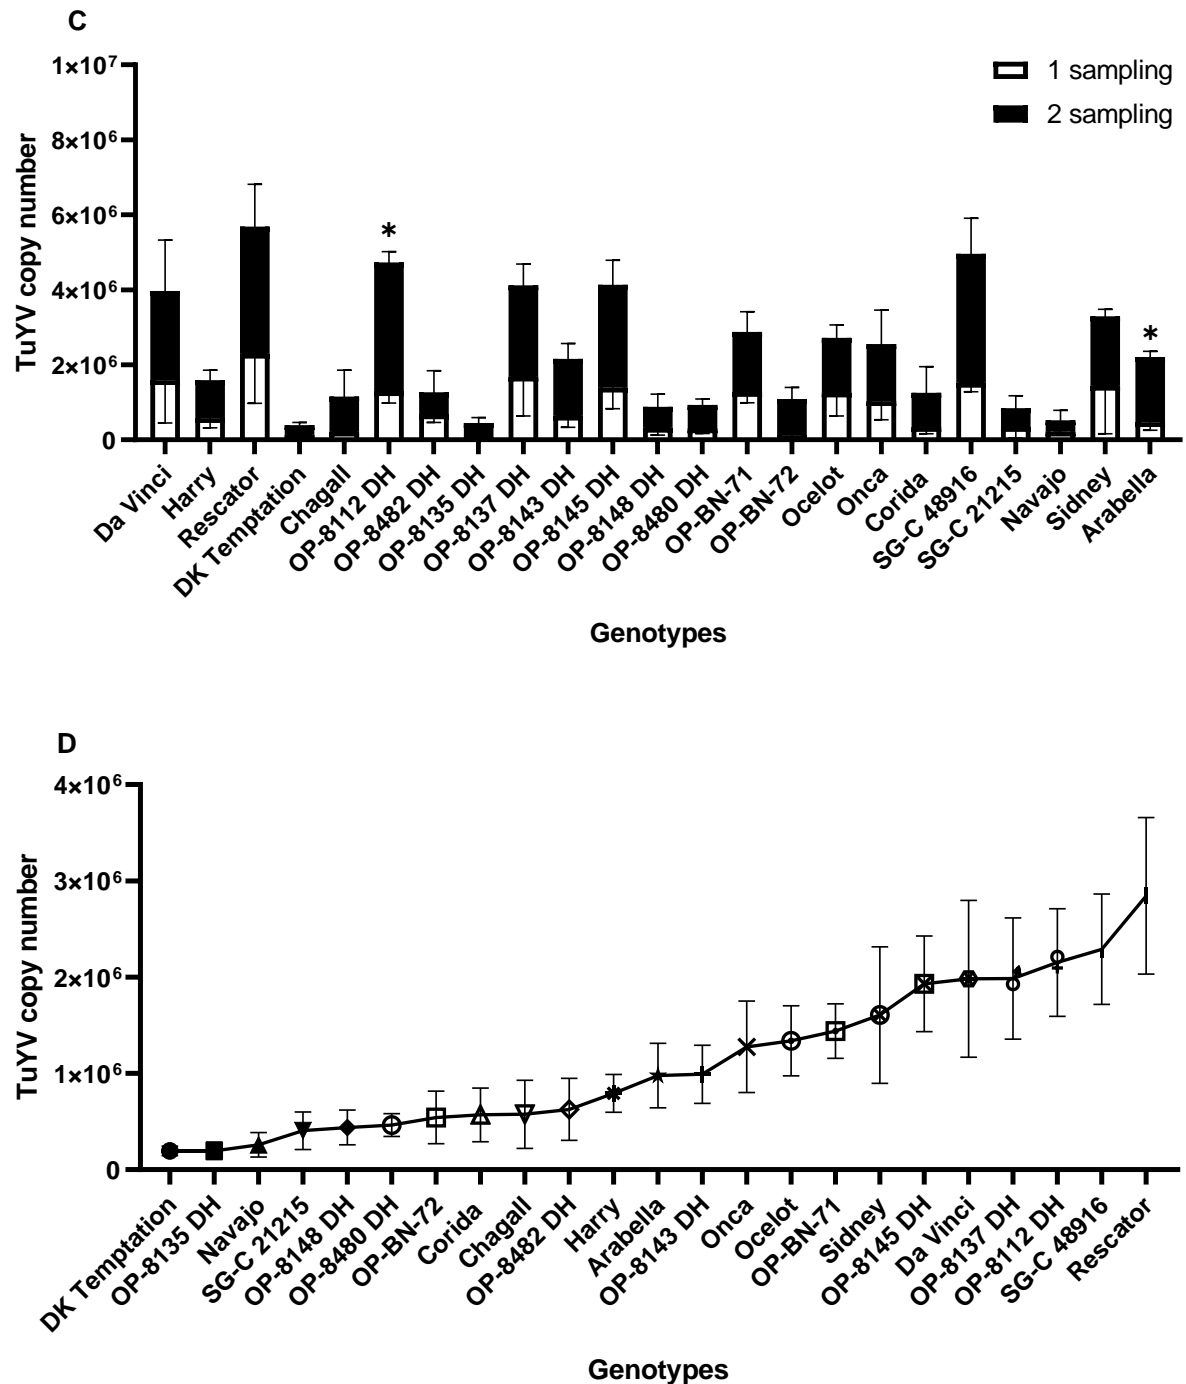

Supplementary Figure S3. The mean TuYV titres (copy number) for each oilseed rape genotypes from the second year field trial (2021/2022). (A) First sampling in autumn 2021, (B) Second sampling in early spring 2022, (C) First sampling in autumn 2021 vs second sampling in early spring 2022, and (D) The total average of both sampling from the second field experiment (2021/2022). Bars on each column represent standard errors.

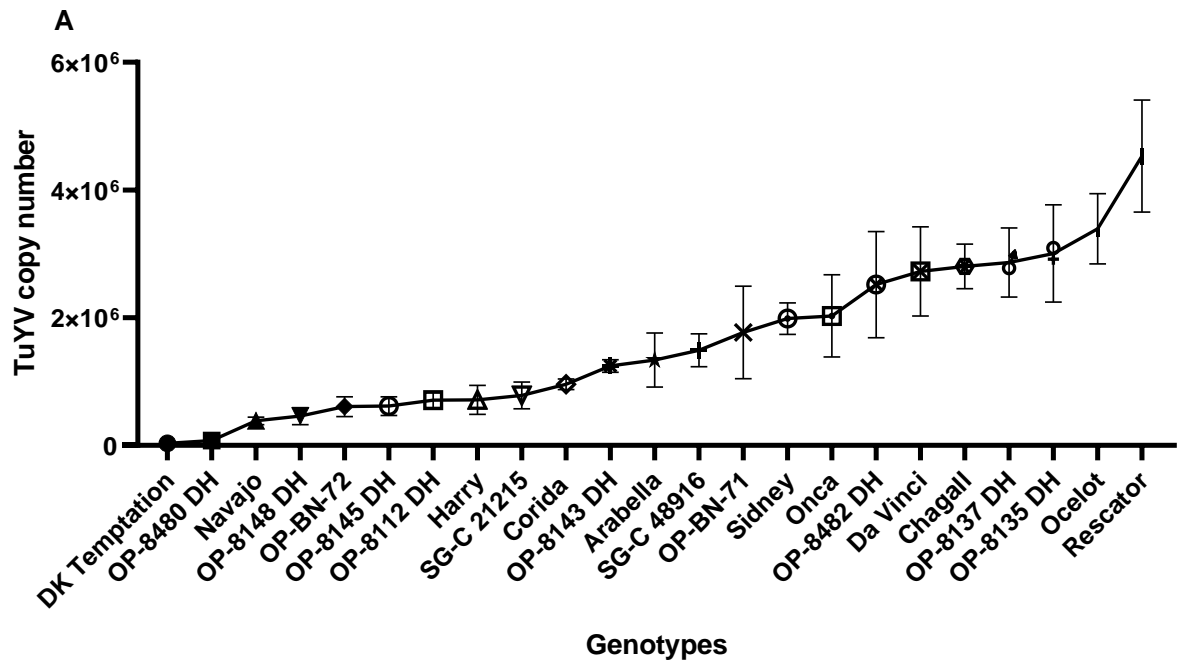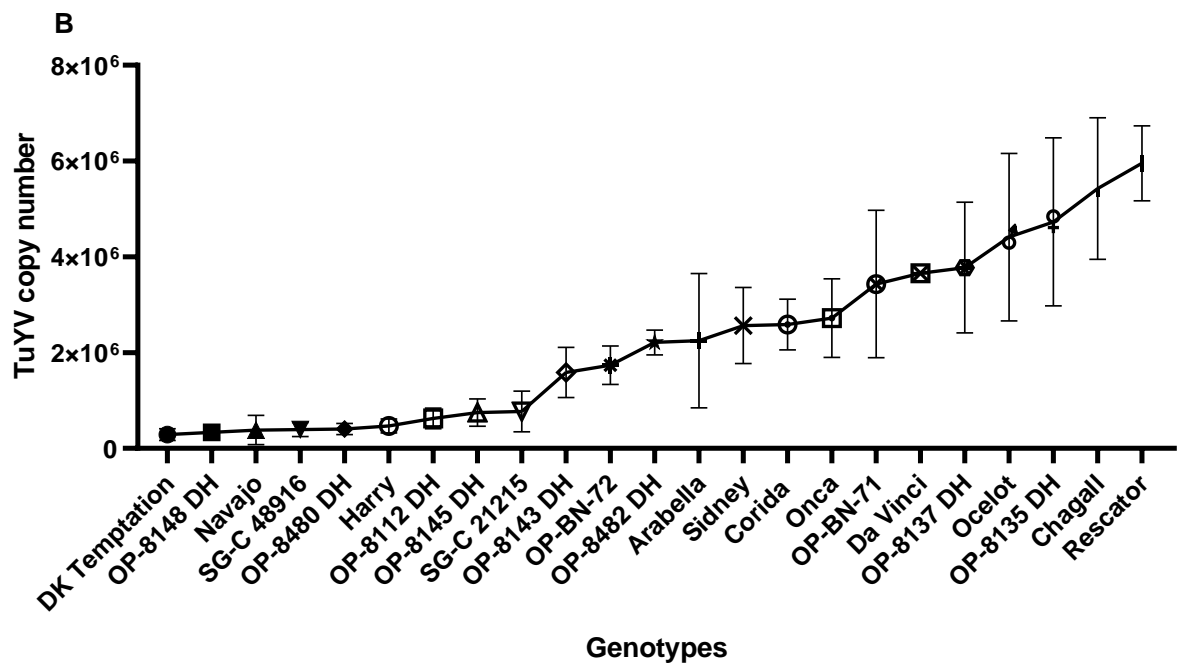

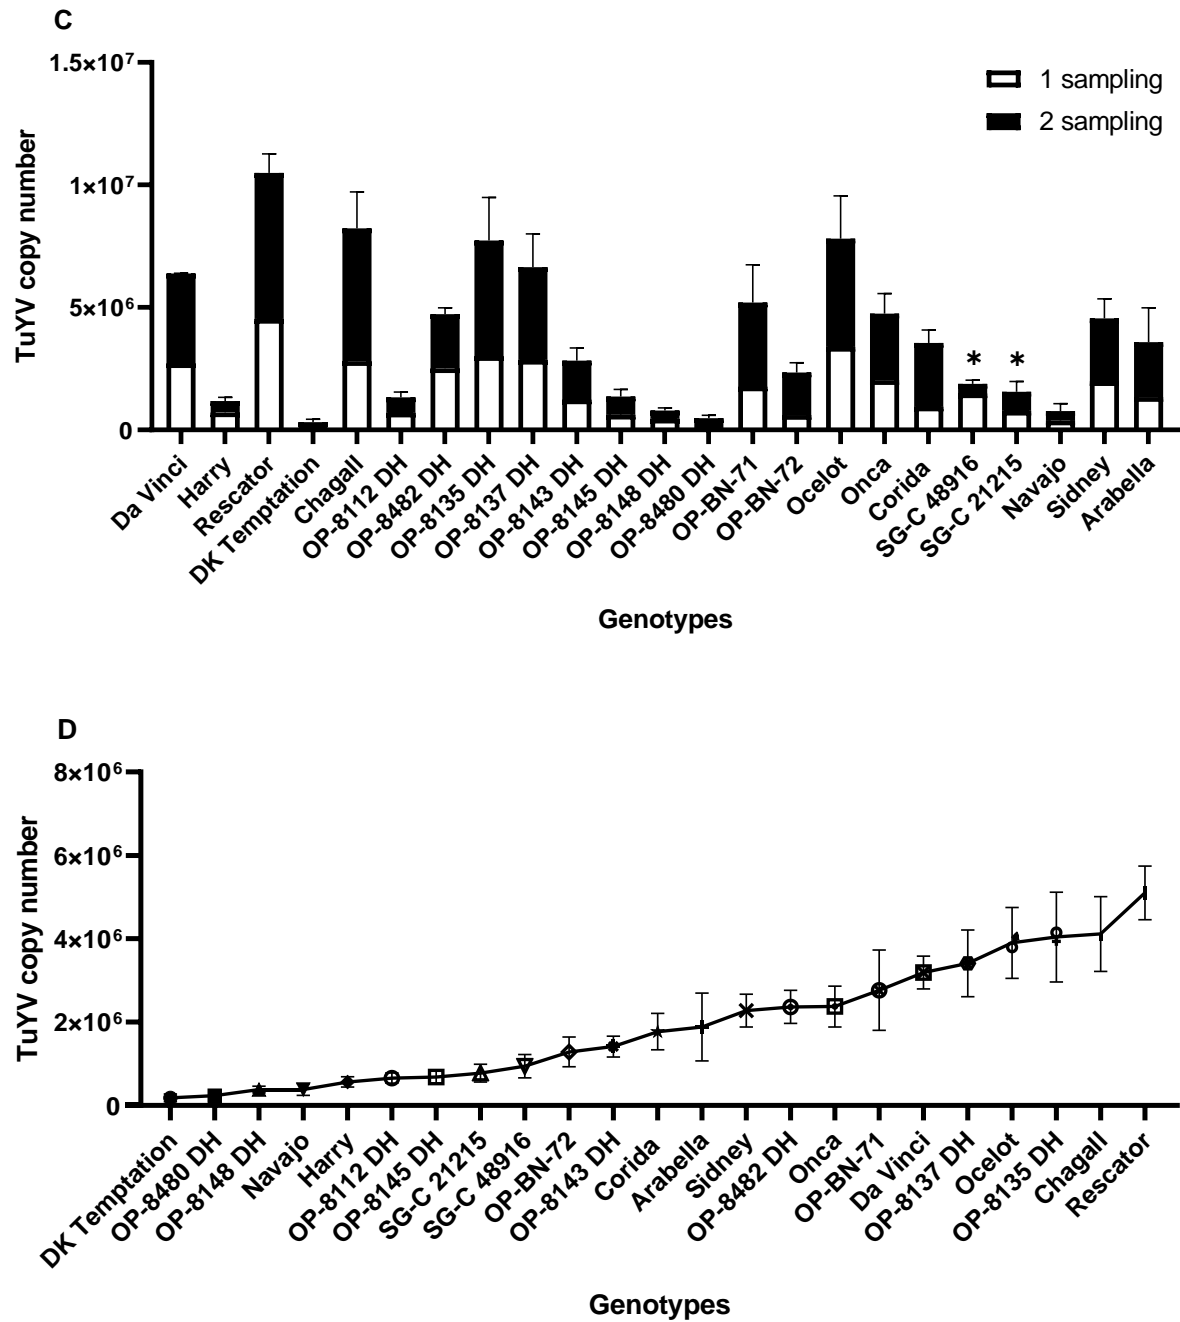

**Supplementary Figure S4.** The mean TuYV titres (copy number) for each oilseed rape genotypes from the third year field trial (2022/2023). (A) First sampling in autumn 2022, (B) Second sampling in early spring 2023, (C) First sampling in autumn 2022 vs second sampling in early spring 2023, and (D) The total average of both sampling from the third field experiment (2022/2023). Bars on each column represent standard errors.

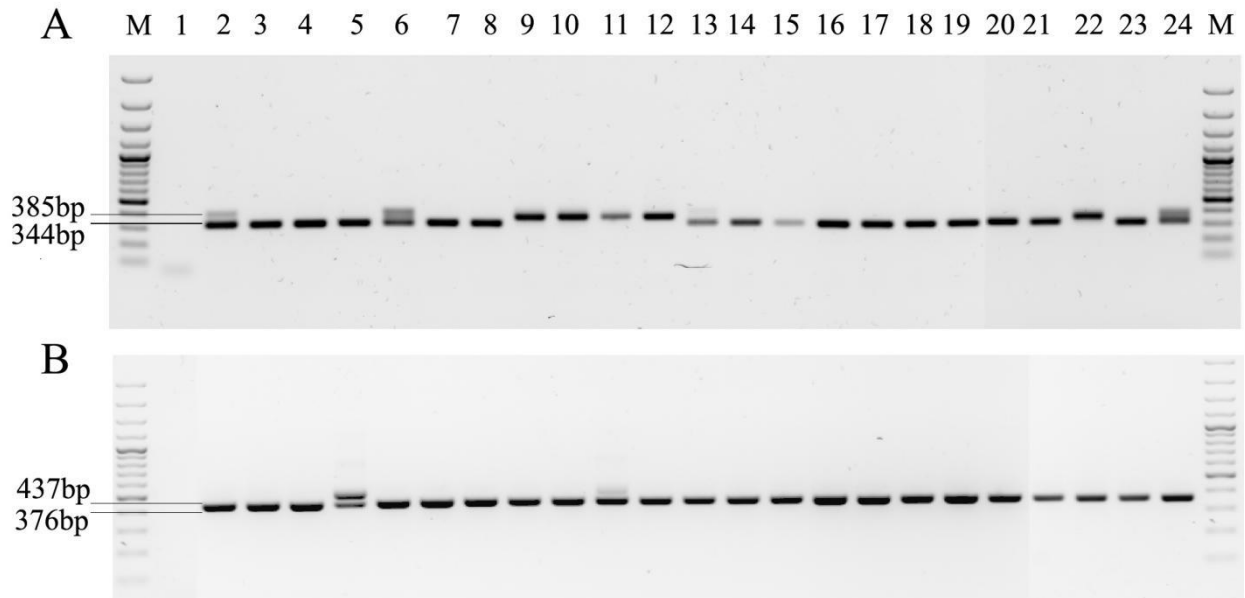

**Supplementary Figure S5.** Molecular marker detection by PCR using the primer pair R54-1F/R54-1R, Resistant: 344bp, Susceptible: 385bp (lane 1 negative control; lanes 2-24, representing the 23 *B. napus* genotypes: Da Vinci, Harry, Rescator, DK Temptation, Chagall, OP-8112 DH, OP-8284 DH, OP-8135 DH, OP-8137 DH, OP-8143 DH, OP-8145 DH, OP-8148 DH, OP-8480 DH, OP-BN-71, OP-BN-72, Ocelot, Onca, Corida, SG-C-48916, SG-C-21215, Navajo, Sidney, Arabella; lane M GeneRuler 100bp DNA ladder, Thermo fisher Scientific, Wilmington, DE, USA). B. Molecular marker detection by PCR using the primer pair R54-2F/R54-2R, Resistant: 437bp, Susceptible: 376bp (The same as in Figure A).
