# Supplementary material for: Evaluation of Resistance of Oilseed Rape Genotypes to Turnip Yellows Virus
Source: MDPI journal article supplement (doi:10.3390/plants12132501), 2023-06-30
Supplement: s1 [file s1]

**Supplementary Table S1.** Significant differences are shown after Tukey's multiple comparisons; compare the mean TuYV titres of control and inoculated samples of each genotype over three-year greenhouse trials (2020/2023). (\* =  $p < 0.05$ , \*\* =  $p < 0.01$ , \*\*\* =  $p < 0.001$ , and \*\*\*\* =  $p < 0.0001$ ).

| NO. | Genotypes     | Summary | P Value |
|-----|---------------|---------|---------|
| 1   | DK Temptation | *       | 0.0443  |
| 2   | OP-8143 DH    | *       | 0.0371  |
| 3   | OP-BN-72      | **      | 0.0014  |
| 4   | Navajo        | *       | 0.0137  |
| 5   | SG-C 21215    | *       | 0.0133  |
| 6   | SG-C 48916    | ***     | 0.0008  |
| 7   | OP-8148 DH    | *       | 0.0326  |
| 8   | Onca          | ***     | 0.0004  |
| 9   | Ocelot        | ****    | <0.0001 |
| 10  | OP-8145 DH    | ***     | 0.0004  |
| 11  | Corida        | ***     | 0.0003  |
| 12  | Da Vinci      | **      | 0.0016  |
| 13  | OP-BN-71      | **      | 0.0085  |
| 14  | Arabella      | *       | 0.0166  |
| 15  | Harry         | **      | 0.0026  |
| 16  | OP-8480 DH    | **      | 0.0012  |
| 17  | OP-8482 DH    | *       | 0.0266  |
| 18  | Chagall       | **      | 0.0043  |
| 19  | OP-8135 DH    | *       | 0.0137  |
| 20  | Sidney        | *       | 0.0417  |
| 21  | OP-8137 DH    | *       | 0.0285  |
| 22  | OP-8112 DH    | *       | 0.0351  |
| 23  | Rescator      | **      | 0.0020  |

**Supplementary Table S2.** Significant differences are shown after Tukey's multiple comparisons; compare the mean of each genotype with the mean of the two reference genotypes. 'DK Temptation' as the resistant genotype and 'Rescator' as the susceptible genotype based on the average of three-year greenhouse trials (\* =  $p < 0.05$ , \*\* =  $p < 0.01$ , \*\*\* =  $p < 0.001$ , and \*\*\*\* =  $p < 0.0001$ ).

| No. | Genotypes                   | Summary | P value | Genotypes                 | Summary | P value |
|-----|-----------------------------|---------|---------|---------------------------|---------|---------|
| 1   | DK Temptation vs OP-8143 DH | ns      | 0.3933  | Rescator vs DK Temptation | ****    | <0.0001 |
| 2   | DK Temptation vs OP-BN-72   | ns      | 0.1557  | Rescator vs OP-8143 DH    | ****    | <0.0001 |
| 3   | DK Temptation vs Navajo     | ns      | 0.1868  | Rescator vs OP-BN-72      | ****    | <0.0001 |
| 4   | DK Temptation vs SG-C 21215 | ns      | 0.0553  | Rescator vs Navajo        | ****    | <0.0001 |
| 5   | DK Temptation vs SG-C 48916 | ****    | <0.0001 | Rescator vs SG-C 21215    | ****    | <0.0001 |
| 6   | DK Temptation vs OP-8148 DH | **      | 0.0091  | Rescator vs SG-C 48916    | ****    | <0.0001 |
| 7   | DK Temptation vs Onca       | ****    | <0.0001 | Rescator vs OP-8148 DH    | ***     | 0.0002  |
| 8   | DK Temptation vs Ocelot     | ****    | <0.0001 | Rescator vs Onca          | ****    | <0.0001 |
| 9   | DK Temptation vs OP-8145 DH | ****    | <0.0001 | Rescator vs Ocelot        | ****    | <0.0001 |
| 10  | DK Temptation vs Corida     | ****    | <0.0001 | Rescator vs OP-8145 DH    | ****    | <0.0001 |
| 11  | DK Temptation vs Da Vinci   | ****    | <0.0001 | Rescator vs Corida        | ***     | 0.0001  |
| 12  | DK Temptation vs OP-BN-71   | ***     | 0.0001  | Rescator vs Da Vinci      | ***     | 0.0002  |
| 13  | DK Temptation vs Arabella   | ***     | 0.0004  | Rescator vs OP-BN-71      | ***     | 0.0002  |
| 14  | DK Temptation vs Harry      | ****    | <0.0001 | Rescator vs Arabella      | ****    | <0.0001 |
| 15  | DK Temptation vs OP-8480 DH | ****    | <0.0001 | Rescator vs Harry         | ****    | <0.0001 |
| 16  | DK Temptation vs OP-8482 DH | ***     | 0.0006  | Rescator vs OP-8480 DH    | ****    | <0.0001 |
| 17  | DK Temptation vs Chagall    | ****    | <0.0001 | Rescator vs OP-8482 DH    | ***     | 0.001   |
| 18  | DK Temptation vs OP-8135 DH | ***     | 0.0002  | Rescator vs Chagall       | ***     | 0.0006  |
| 19  | DK Temptation vs Sidney     | **      | 0.0012  | Rescator vs OP-8135 DH    | ***     | 0.0002  |
| 20  | DK Temptation vs OP-8137 DH | ***     | 0.0005  | Rescator vs Sidney        | **      | 0.0016  |
| 21  | DK Temptation vs OP-8112 DH | ****    | <0.0001 | Rescator vs OP-8137 DH    | **      | 0.0024  |
| 22  | DK Temptation vs Rescator   | ****    | <0.0001 | Rescator vs OP-8112 DH    | **      | 0.002   |

**Supplementary Table S3.** Significant differences are shown after Tukey's multiple comparisons; compare the mean TuYV titres of control and inoculated samples of each genotype over three-year field trials (2020/2023). (\* =  $p < 0.05$ , \*\* =  $p < 0.01$ , \*\*\* =  $p < 0.001$ , and \*\*\*\* =  $p < 0.0001$ ).

| NO. | Genotypes     | Summary | P Value |
|-----|---------------|---------|---------|
| 1   | DK Temptation | *       | 0.0182  |
| 2   | Navajo        | No      | 0.0776  |
| 3   | OP-8148 DH    | *       | 0.0223  |
| 4   | SG-C 21215    | *       | 0.0128  |
| 5   | OP-8480 DH    | No      | 0.1809  |
| 6   | OP-BN-72      | *       | 0.0219  |
| 7   | Harry         | *       | 0.0499  |
| 8   | OP-8145 DH    | *       | 0.0328  |
| 9   | OP-8143 DH    | **      | 0.0024  |
| 10  | SG-C 48916    | *       | 0.0414  |
| 11  | OP-8112 DH    | *       | 0.0225  |
| 12  | Arabella      | *       | 0.0437  |
| 13  | Corida        | *       | 0.0492  |
| 14  | Onca          | *       | 0.0126  |
| 15  | OP-BN-71      | *       | 0.0355  |
| 16  | OP-8482 DH    | *       | 0.0339  |
| 17  | Da Vinci      | *       | 0.0247  |
| 18  | Sidney        | *       | 0.0107  |
| 19  | Chagall       | *       | 0.0479  |
| 20  | OP-8135 DH    | *       | 0.0480  |
| 21  | Ocelot        | *       | 0.0138  |
| 22  | OP-8137 DH    | **      | 0.0069  |
| 23  | Rescator      | *       | 0.0104  |

**Supplementary Table S4.** Significant differences are shown after Tukey's multiple comparisons; compare the mean of each genotype with the mean of the two reference genotypes. 'DK Temptation' as the resistant genotype and 'Rescator' as the susceptible genotype based on the average of three-year field trials (\* =  $p < 0.05$ , \*\* =  $p < 0.01$ , \*\*\* =  $p < 0.001$ , and \*\*\*\* =  $p < 0.0001$ ).

| No. | Genotypes                    | Summary | P Value | Genotypes                  | Summary | P Value |
|-----|------------------------------|---------|---------|----------------------------|---------|---------|
| 1   | DK Temptation vs. Navajo     | ns      | 0.3463  | Rescator vs. DK Temptation | ****    | <0.0001 |
| 2   | DK Temptation vs. OP-8148 DH | ns      | 0.0582  | Rescator vs. Navajo        | ****    | <0.0001 |
| 3   | DK Temptation vs. SG-C 21215 | ns      | 0.0633  | Rescator vs. OP-8148 DH    | ****    | <0.0001 |
| 4   | DK Temptation vs. OP-8480 DH | ns      | 0.0803  | Rescator vs. SG-C 21215    | ****    | <0.0001 |
| 5   | DK Temptation vs. OP-BN-72   | ***     | 0.0001  | Rescator vs. OP-8480 DH    | ****    | <0.0001 |
| 6   | DK Temptation vs. Harry      | **      | 0.0017  | Rescator vs. OP-BN-72      | ****    | <0.0001 |
| 7   | DK Temptation vs. OP-8145 DH | ***     | 0.0005  | Rescator vs. Harry         | ****    | <0.0001 |
| 8   | DK Temptation vs. OP-8143 DH | ****    | <0.0001 | Rescator vs. OP-8145 DH    | ****    | <0.0001 |
| 9   | DK Temptation vs. SG-C 48916 | ***     | 0.0007  | Rescator vs. OP-8143 DH    | ****    | <0.0001 |
| 10  | DK Temptation vs. OP-8112 DH | ****    | <0.0001 | Rescator vs. SG-C 48916    | ****    | <0.0001 |
| 11  | DK Temptation vs. Arabella   | ***     | 0.0005  | Rescator vs. OP-8112 DH    | ****    | <0.0001 |
| 12  | DK Temptation vs. Corida     | **      | 0.0031  | Rescator vs. Arabella      | ****    | <0.0001 |
| 13  | DK Temptation vs. Onca       | ****    | <0.0001 | Rescator vs. Corida        | ****    | <0.0001 |
| 14  | DK Temptation vs. OP-BN-71   | ***     | 0.0002  | Rescator vs. Onca          | ****    | <0.0001 |
| 15  | DK Temptation vs. OP-8482 DH | ***     | 0.0003  | Rescator vs. OP-BN-71      | ****    | <0.0001 |
| 16  | DK Temptation vs. Da Vinci   | ****    | <0.0001 | Rescator vs. OP-8482 DH    | ****    | <0.0001 |
| 17  | DK Temptation vs. Sidney     | ****    | <0.0001 | Rescator vs. Da Vinci      | ****    | <0.0001 |
| 18  | DK Temptation vs. Chagall    | **      | 0.0013  | Rescator vs. Sidney        | ****    | <0.0001 |
| 19  | DK Temptation vs. OP-8135 DH | ***     | 0.0006  | Rescator vs. Chagall       | ****    | <0.0001 |
| 20  | DK Temptation vs. Ocelot     | ****    | <0.0001 | Rescator vs. OP-8135 DH    | **      | 0.0014  |
| 21  | DK Temptation vs. OP-8137 DH | ****    | <0.0001 | Rescator vs. Ocelot        | **      | 0.0011  |
| 22  | DK Temptation vs. Rescator   | ****    | <0.0001 | Rescator vs. OP-8137 DH    | **      | 0.0029  |

**Supplementary Table S5.** Significant differences are shown after Tukey's test for multiple comparisons. Comparison of autumn and spring samples of the mean TuYV titres (copy number) for each genotype from two-year field trials (2021/2023). (\* =  $p < 0.05$ , \*\* =  $p < 0.01$ , \*\*\* =  $p < 0.001$ , and \*\*\*\* =  $p < 0.0001$ ).

| No. | Genotypes     | Summary | P Value  |
|-----|---------------|---------|----------|
| 1   | Da Vinci      | ns      | 0.461075 |
| 2   | Harry         | ns      | 0.884075 |
| 3   | Rescator      | ns      | 0.446187 |
| 4   | DK Temptation | *       | 0.048864 |
| 5   | Chagall       | ns      | 0.255236 |
| 6   | OP-8112 DH    | ns      | 0.379159 |
| 7   | OP-8482 DH    | ns      | 0.632211 |
| 8   | OP-8135 DH    | ns      | 0.315565 |
| 9   | OP-8137 DH    | ns      | 0.34049  |
| 10  | OP-8143 DH    | ns      | 0.121665 |
| 11  | OP-8145 DH    | ns      | 0.394665 |
| 12  | OP-8148 DH    | *       | 0.750193 |
| 13  | OP-8480 DH    | ns      | 0.031134 |
| 14  | OP-BN-71      | ns      | 0.30746  |
| 15  | OP-BN-72      | *       | 0.025303 |
| 16  | Ocelot        | ns      | 0.497651 |
| 17  | Onca          | ns      | 0.44745  |
| 18  | Corida        | *       | 0.039289 |
| 19  | SG-C 48916    | ns      | 0.887754 |
| 20  | SG-C 21215    | ns      | 0.752042 |
| 21  | Navajo        | ns      | 0.844212 |
| 22  | Sidney        | ns      | 0.484067 |
| 23  | Arabella      | ns      | 0.177339 |

**Supplementary Table S6.** Significant differences are shown after Tukey's test for multiple comparisons. Comparison of three year greenhouse trials vs three year field trials (2020-2023). (\* =  $p < 0.05$ , \*\* =  $p < 0.01$ , \*\*\* =  $p < 0.001$ , and \*\*\*\* =  $p < 0.0001$ ).

| No. | Genotypes     | Summary | P Value  |
|-----|---------------|---------|----------|
| 1   | DK Temptation | ns      | 0.396262 |
| 2   | Navajo        | ns      | 0.883450 |
| 3   | OP-8148 DH    | *       | 0.033463 |
| 4   | SG-C 21215    | ns      | 0.144665 |
| 5   | OP-8480 DH    | *       | 0.017391 |
| 6   | OP-BN-72      | *       | 0.010909 |
| 7   | Harry         | ns      | 0.150106 |
| 8   | OP-8145 DH    | ns      | 0.764876 |
| 9   | OP-8143 DH    | ***     | 0.000321 |
| 10  | SG-C 48916    | ns      | 0.323163 |
| 11  | OP-8112 DH    | *       | 0.020351 |
| 12  | Arabella      | ns      | 0.874104 |
| 13  | Corida        | ns      | 0.819358 |
| 14  | Onca          | ns      | 0.230112 |
| 15  | OP-BN-71      | ns      | 0.613403 |
| 16  | OP-8482 DH    | ns      | 0.938538 |
| 17  | Da Vinci      | ns      | 0.319294 |
| 18  | Sidney        | ns      | 0.626169 |
| 19  | Chagall       | ns      | 0.967130 |
| 20  | OP-8135 DH    | ns      | 0.823471 |
| 21  | Ocelot        | ns      | 0.075176 |
| 22  | OP-8137 DH    | ns      | 0.804402 |
| 23  | Rescator      | *       | 0.011231 |

**Supplementary Table S7.** Yield reduction of the oilseed rape genotypes due to TuYV infection in 2021/2022.

|          | Non inoculated control plots |          |          |                       |                  | TuYV inoculated plots |             |          |          |                       |                  | % of yield reduction due to TuYV infection |
|----------|------------------------------|----------|----------|-----------------------|------------------|-----------------------|-------------|----------|----------|-----------------------|------------------|--------------------------------------------|
| Genotype | Plot number                  | Yield/ha | moisture | recalculated yield/ha | Average yield/ha | Genotype              | Plot number | Yield/ha | moisture | recalculated yield/ha | Average yield/ha |                                            |
| Da Vinci | 661                          | 4.55     | 7.9      | 4.72                  | 5.24             | Da Vinci              | 662         | 3.9      | 8.2      | 4.04                  | 4.66             | 89.01                                      |
|          | 744                          | 5.85     | 8.2      | 6.06                  |                  |                       | 743         | 4.9      | 8.2      | 5.07                  |                  |                                            |
|          | 775                          | 4.65     | 5.6      | 4.93                  |                  |                       | 776         | 4.7      | 8        | 4.87                  |                  |                                            |
| Harry    | 663                          | 5.15     | 8.2      | 5.33                  | 5.65             | Harry                 | 664         | 4.7      | 7.1      | 4.92                  | 4.93             | 87.33                                      |
|          | 730                          | 5.5      | 7.9      | 5.71                  |                  |                       | 729         | 4.75     | 7.7      | 4.94                  |                  |                                            |
|          | 807                          | 5.75     | 9        | 5.91                  |                  |                       | 808         | 4.8      | 8.7      | 4.95                  |                  |                                            |
| Rescator | 665                          | 5.5      | 7.7      | 5.72                  | 5.45             | Rescator              | 666         | 4.25     | 7.6      | 4.42                  | 4.90             | 89.79                                      |
|          | 708                          | 4.8      | 7.5      | 5.00                  |                  |                       | 707         | 4.95     | 7.3      | 5.17                  |                  |                                            |
|          | 799                          | 5.45     | 8.2      | 5.64                  |                  |                       | 800         | 4.95     | 8.7      | 5.10                  |                  |                                            |
|          | 667                          | 6.1      | 7.8      | 6.34                  | 6.16             |                       | 668         | 4.45     | 7.3      | 4.64                  | 5.23             | 85.03                                      |

|               |     |      |     |      |      |               |     |      |     |      |      |       |
|---------------|-----|------|-----|------|------|---------------|-----|------|-----|------|------|-------|
| DK Temptation | 732 | 6.05 | 8.3 | 6.26 |      | DK Temptation | 731 | 4.95 | 7.8 | 5.14 |      |       |
|               | 781 | 5.75 | 9.6 | 5.88 |      |               | 782 | 5.7  | 7.9 | 5.92 |      |       |
| Chagall       | 669 | 5.25 | 7.5 | 5.47 | 5.21 | Chagall       | 670 | 4.45 | 7.7 | 4.63 | 4.65 | 89.33 |
|               | 710 | 4.5  | 8.1 | 4.66 |      |               | 709 | 4.65 | 8   | 4.82 |      |       |
|               | 791 | 5.3  | 8.1 | 5.49 |      |               | 792 | 4.35 | 8.1 | 4.51 |      |       |
| OP-8112 DH    | 671 | 5.7  | 8.3 | 5.89 | 5.37 | OP-8112 DH    | 672 | 4.65 | 7.3 | 4.85 | 5.29 | 98.50 |
|               | 718 | 5.05 | 9.6 | 5.16 |      |               | 717 | 4.85 | 8.2 | 5.02 |      |       |
|               | 801 | 4.9  | 8.6 | 5.05 |      |               | 802 | 5.8  | 8.4 | 5.99 |      |       |
| 7 OP-8482 DH  | 673 | 5.6  | 7.9 | 5.81 | 5.37 | 7 OP-8482 DH  | 674 | 4.7  | 8   | 4.87 | 4.91 | 91.47 |
|               | 724 | 4.7  | 8.1 | 4.87 |      |               | 723 | 4.75 | 8.3 | 4.91 |      |       |
|               | 773 | 5.25 | 8.3 | 5.43 |      |               | 774 | 4.8  | 8.6 | 4.95 |      |       |
| OP-8135 DH    | 675 | 5.55 | 8.4 | 5.73 | 5.77 | OP-8135 DH    | 676 | 4.1  | 7.7 | 4.26 | 4.66 | 80.88 |
|               | 740 | 5.4  | 8   | 5.60 |      |               | 739 | 4.95 | 8.4 | 5.11 |      |       |



|            |     |      |     |      |      |            |     |      |     |      |      |       |
|------------|-----|------|-----|------|------|------------|-----|------|-----|------|------|-------|
|            | 789 | 5.7  | 7   | 5.97 |      |            | 790 | 4.45 | 8   | 4.61 |      |       |
| OP-8137 DH | 677 | 5    | 8.2 | 5.18 | 4.92 | OP-8137 DH | 678 | 4.2  | 8.2 | 4.35 | 4.61 | 93.72 |
|            | 752 | 4.65 | 8.2 | 4.81 |      |            | 751 | 4.7  | 8.4 | 4.86 |      |       |
|            | 813 | 4.65 | 9.2 | 4.77 |      |            | 814 | 4.5  | 8.9 | 4.63 |      |       |
| OP-8143 DH | 679 | 5.6  | 8.1 | 5.80 | 5.20 | OP-8143 DH | 680 | 3.95 | 7.9 | 4.10 | 4.45 | 85.51 |
|            | 716 | 4.8  | 8.7 | 4.95 |      |            | 715 | 4.05 | 9   | 4.16 |      |       |
|            | 817 | 4.7  | 8.5 | 4.85 |      |            | 818 | 4.9  | 8.1 | 5.08 |      |       |
| OP-8145 DH | 681 | 6    | 8.7 | 6.18 | 6.11 | OP-8145 DH | 682 | 4.55 | 8.4 | 4.70 | 4.95 | 81.06 |
|            | 734 | 6.2  | 9.3 | 6.35 |      |            | 733 | 4.9  | 8.4 | 5.06 |      |       |
|            | 805 | 5.6  | 8.3 | 5.79 |      |            | 806 | 4.95 | 8.9 | 5.09 |      |       |
| OP-8148 DH | 683 | 4.9  | 8.6 | 5.05 | 5.20 | OP-8148 DH | 684 | 4.45 | 7.8 | 4.62 | 4.55 | 87.60 |
|            | 738 | 5.35 | 8.3 | 5.53 |      |            | 737 | 4.2  | 8.2 | 4.35 |      |       |
|            | 797 | 4.85 | 8.5 | 5.01 |      |            | 798 | 4.55 | 8.7 | 4.69 |      |       |

|            |     |      |     |      |      |            |     |      |     |      |      |       |
|------------|-----|------|-----|------|------|------------|-----|------|-----|------|------|-------|
| OP-8480 DH | 685 | 3.75 | 7.9 | 3.89 | 4.14 | OP-8480 DH | 686 | 3.15 | 8.6 | 3.25 | 3.35 | 80.98 |
|            | 722 | 3.55 | 8.6 | 3.66 |      |            | 721 | 3.65 | 7.6 | 3.80 |      |       |
|            | 777 | 4.7  | 8.3 | 4.86 |      |            | 778 | 2.9  | 8.1 | 3.00 |      |       |
| OP-BN-71   | 687 | 4.75 | 8.2 | 4.92 | 5.73 | OP-BN-71   | 688 | 4.95 | 7.4 | 5.16 | 5.12 | 89.33 |
|            | 736 | 6.05 | 8.1 | 6.27 |      |            | 735 | 5    | 8   | 5.19 |      |       |
|            | 783 | 5.8  | 8.3 | 6.00 |      |            | 784 | 4.85 | 8.6 | 5.00 |      |       |
| OP-BN-72   | 689 | 4    | 8.5 | 4.13 | 5.21 | OP-BN-72   | 690 | 3.85 | 8.4 | 3.98 | 4.61 | 88.39 |
|            | 750 | 6.15 | 8   | 6.38 |      |            | 749 | 4.95 | 8.3 | 5.12 |      |       |
|            | 787 | 5    | 9.1 | 5.13 |      |            | 788 | 4.6  | 9   | 4.73 |      |       |
| Ocelot     | 691 | 5.25 | 8.7 | 5.41 | 5.75 | Ocelot     | 692 | 4.85 | 7.9 | 5.03 | 5.05 | 87.75 |
|            | 742 | 6.1  | 8.7 | 6.29 |      |            | 741 | 5.15 | 9   | 5.29 |      |       |
|            | 815 | 5.4  | 8.7 | 5.56 |      |            | 816 | 4.65 | 8.1 | 4.82 |      |       |
| Onca       | 693 | 4.15 | 7.9 | 4.31 | 5.39 | Onca       | 694 | 3.95 | 8.2 | 4.09 | 4.46 | 82.91 |

|            |     |      |     |      |      |            |     |      |     |      |      |        |
|------------|-----|------|-----|------|------|------------|-----|------|-----|------|------|--------|
|            | 728 | 5.65 | 7.9 | 5.86 |      |            | 727 | 4.85 | 8   | 5.03 |      |        |
|            | 785 | 5.7  | 6.7 | 5.98 |      |            | 786 | 4.15 | 8.7 | 4.28 |      |        |
| Corida     | 695 | 5.2  | 9   | 5.34 | 5.43 | Corida     | 696 | 4.75 | 8   | 4.93 | 5.19 | 95.61  |
|            | 748 | 5.75 | 7.5 | 5.99 |      |            | 747 | 5.05 | 7.8 | 5.25 |      |        |
|            | 811 | 4.8  | 8.3 | 4.96 |      |            | 812 | 5.25 | 8.7 | 5.41 |      |        |
| SG-C 48916 | 697 | 3.55 | 8.6 | 3.66 | 4.94 | SG-C 48916 | 698 | 4.15 | 8.4 | 4.29 | 4.56 | 92.29  |
|            | 712 | 5.05 | 8.6 | 5.21 |      |            | 711 | 5    | 8.3 | 5.17 |      |        |
|            | 779 | 5.8  | 8.9 | 5.97 |      |            | 780 | 4.1  | 8.5 | 4.23 |      |        |
| SG-C 21215 | 699 | 4.95 | 7.8 | 5.14 | 5.73 | SG-C 21215 | 700 | 4.7  | 7.7 | 4.89 | 5.15 | 89.82  |
|            | 726 | 5.85 | 8.7 | 6.03 |      |            | 725 | 5.4  | 8.3 | 5.58 |      |        |
|            | 795 | 5.8  | 7.9 | 6.02 |      |            | 796 | 4.8  | 8.2 | 4.97 |      |        |
| Navajo     | 701 | 4.35 | 8.3 | 4.50 | 4.20 | Navajo     | 702 | 3.95 | 7.8 | 4.10 | 4.25 | 101.34 |
|            | 720 | 4    | 8.3 | 4.14 |      |            | 719 | 4.3  | 8.3 | 4.45 |      |        |

|          |     |      |     |      |      |          |     |      |     |      |      |       |
|----------|-----|------|-----|------|------|----------|-----|------|-----|------|------|-------|
|          | 803 | 3.85 | 8.9 | 3.96 |      |          | 804 | 4.1  | 9   | 4.21 |      |       |
| Sidney   | 703 | 4.5  | 8.1 | 4.66 | 5.13 | Sidney   | 704 | 3.75 | 8.9 | 3.86 | 4.34 | 84.71 |
|          | 714 | 5.2  | 8.5 | 5.37 |      |          | 713 | 4.5  | 8.4 | 4.65 |      |       |
|          | 809 | 5.2  | 8.8 | 5.35 |      |          | 810 | 4.4  | 8.9 | 4.53 |      |       |
| Arabella | 705 | 4.85 | 7.6 | 5.05 | 5.53 | Arabella | 706 | 4.45 | 7.8 | 4.62 | 4.91 | 88.95 |
|          | 746 | 5.7  | 7.8 | 5.92 |      |          | 745 | 5    | 8   | 5.19 |      |       |
|          | 793 | 5.4  | 7.9 | 5.61 |      |          | 794 | 4.75 | 7.8 | 4.94 |      |       |

Supplementary Table S8. Primers used in this study.

| PCR Fragment Length (bp) |                      |                       |                         |                      |           |
|--------------------------|----------------------|-----------------------|-------------------------|----------------------|-----------|
| Primer name              | Sequence (5' → 3')   | Resistant<br>Genotype | Susceptible<br>Genotype | Detection<br>Methods | Reference |
| TuYVF-K1                 | TACGGTCGTGGGTAGGAGAA | 185                   |                         | qPCR                 | [11]      |
| TuYVR-K1                 | TCGAACCTGCTCCTCTGGTA |                       |                         |                      |           |
| R 54-1F                  | GATCCGTTTGGGTCTTGGTA | 344 bp                | 385 bp                  | RT-PCR               | [29]      |
| R 54-1R                  | TTGATGTGAAACGCACATTG |                       |                         |                      |           |
| R 54-2F                  | ATCGGACATTGGTCAGGTTC | 437 bp                | 376 bp                  | RT-PCR               | [29]      |
| R 54-2R                  | CATACCCCACTGGTTCTTGG |                       |                         |                      |           |
